# Supplementary material for: Leak-free and shape-stabilized phase change composites with radial spherical SiO2 scaffolds for thermal management
Source: Royal Society of Chemistry journal article supplement (doi:10.1039/d2nj03485a), 2022-01-01
Supplement: d2nj03485a1.pdf [file d2nj03485a1.pdf]

**Supporting Information:**

**Leak-free and shape-stabilized phase change composites with  
radial spherical SiO<sub>2</sub> scaffolds for thermal management**

Yuxuan Zhang <sup>a</sup>, Jialiang Zhou <sup>b</sup>, Ziye Chen <sup>a</sup>, Zexu Hu <sup>a,\*</sup>, Mugaanire Tendo Innocent <sup>a</sup>, Siyu

Yin <sup>a</sup>, Hengxue Xiang <sup>a,\*</sup>, Jin Wen <sup>a</sup> and Meifang Zhu <sup>a</sup>

<sup>a</sup> State Key Laboratory for Modification of Chemical Fibers and Polymer Materials, College of  
Materials Science and Engineering, Donghua University, Shanghai 201620, China

<sup>b</sup> Jiangsu Gem Advanced Fiber Materials Research Institute Co., Ltd, Nantong 226000, China

Corresponding author:

Tel: +86 21 67792857; Fax: +86 21 67792855.

E-mail address: huzexu@dhu.edu.cn (Z.X. Hu), hengxuexiang@dhu.edu.cn (H.X. Xiang)

**Figure S1.** Digital photos of radial spherical maple fruit.

(a) fresh fruit, (b) dried fruit after the release of seeds.

**Figure S2.** Synthetic route of  $\text{RSSiO}_2$ .

**Figure S3.** SEM images, TEM images, particle size distribution, and  $\text{N}_2$  sorption isotherm (pore size distribution in inset) with a urea concentration of (a) 0.6 g and HMT concentrations of (b) 0.2 g, (c) 0.4 g, (d) 0.8 g, (e) 1.0 g.

**Figure S4.** SEM images, TEM images, particle size distribution, and  $\text{N}_2$  sorption isotherm (pore size distribution in inset) with a HMT concentration of 0.6 g and 1-pentanol concentrations of (a) 1.1 mL, (b) 1.3 mL, (c) 1.7 mL, (d) 1.9 mL.

**Figure S5. Thermal management abilities of  $\text{RSSiO}_2/\text{PEG}$  composites.** (a) Performance of the heat storage of  $\text{RSSiO}_2$  and  $\text{RSSiO}_2/\text{PEG}_{70}$ : (a1) from  $-5\text{ }^\circ\text{C}$  to  $40\text{ }^\circ\text{C}$ , (a2) from  $-5\text{ }^\circ\text{C}$  to  $60\text{ }^\circ\text{C}$ , (a3) from  $-5\text{ }^\circ\text{C}$  to  $70\text{ }^\circ\text{C}$ . (b) Performance of the heat release on  $\text{RSSiO}_2$  and  $\text{RSSiO}_2/\text{PEG}_{70}$ : (b1) from  $80\text{ }^\circ\text{C}$  to  $25\text{ }^\circ\text{C}$ , (b2) from  $80\text{ }^\circ\text{C}$  to  $15\text{ }^\circ\text{C}$ , (b3) from  $80\text{ }^\circ\text{C}$  to  $5\text{ }^\circ\text{C}$ .

**Table S1** Thermal stability parameters of  $\text{RSSiO}_2/\text{PEG}$  composites.

**Table S2** DSC heating and cooling characteristics of neat PEG and  $\text{RSSiO}_2/\text{PEG}$ .

**Table S3** Diffraction peak positions and crystallinity of PEG and  $\text{RSSiO}_2/\text{PEG}_x$ .

**Table S4** DSC parameters of heat-treated  $\text{RSSiO}_2/\text{PEG}_{70}$  under 100 cycles of melting/  
crystallization.

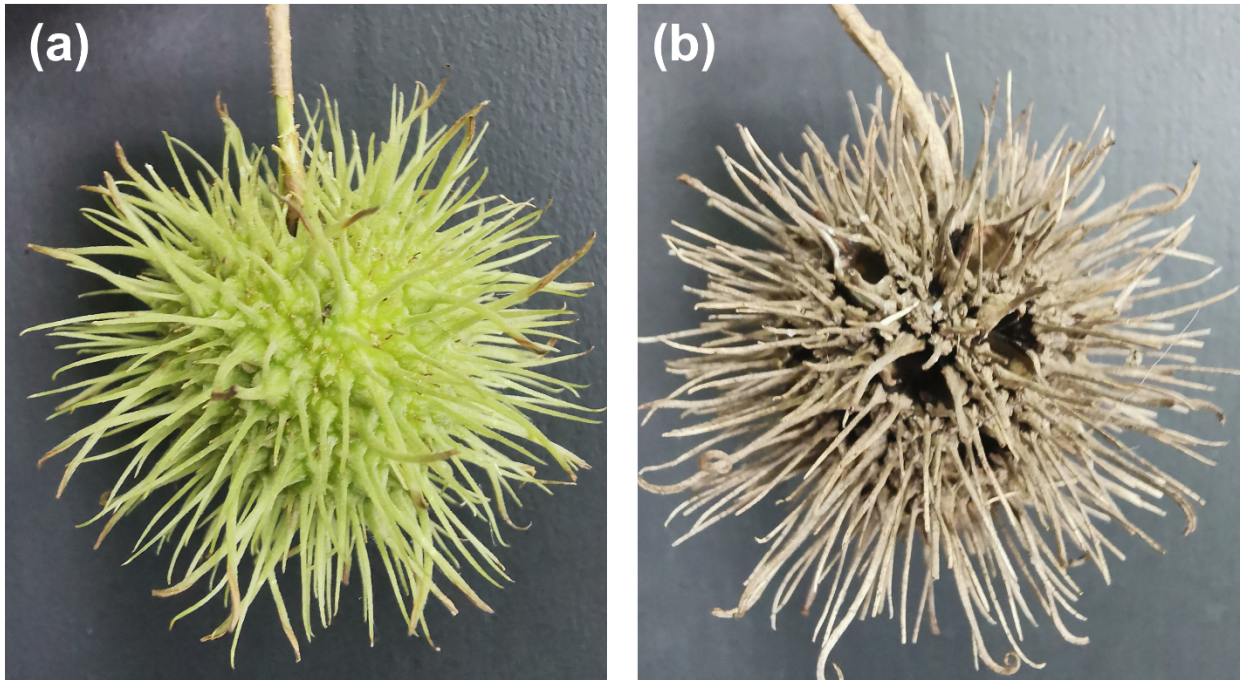

**Figure S1.** Digital photos of radial spherical maple fruit.

(a) fresh fruit, (b) dried fruit after the release of seeds.

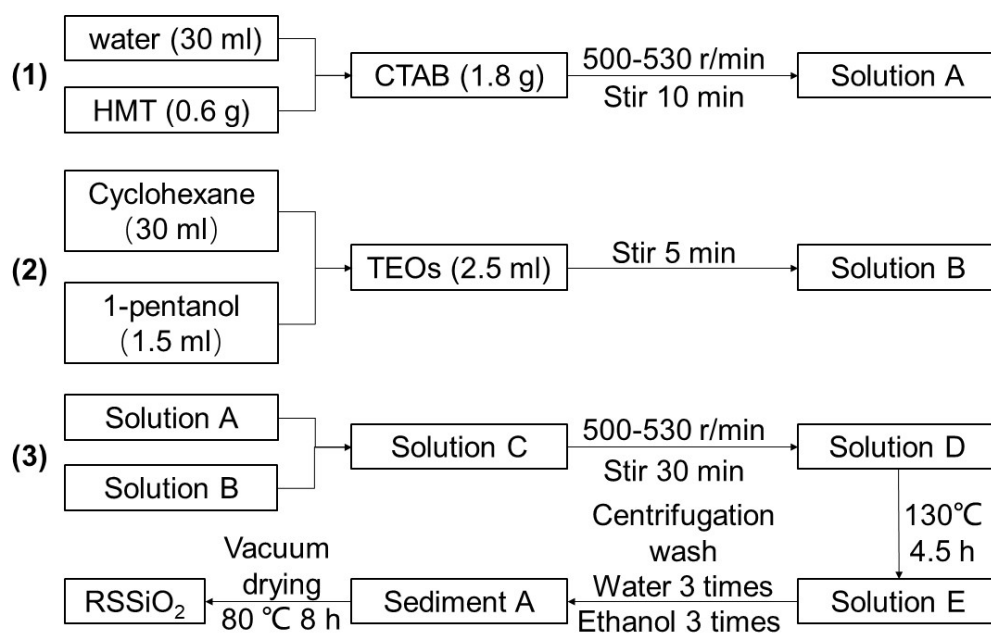

**Figure S2.** Synthetic route of of  $\text{RSSiO}_2$ .

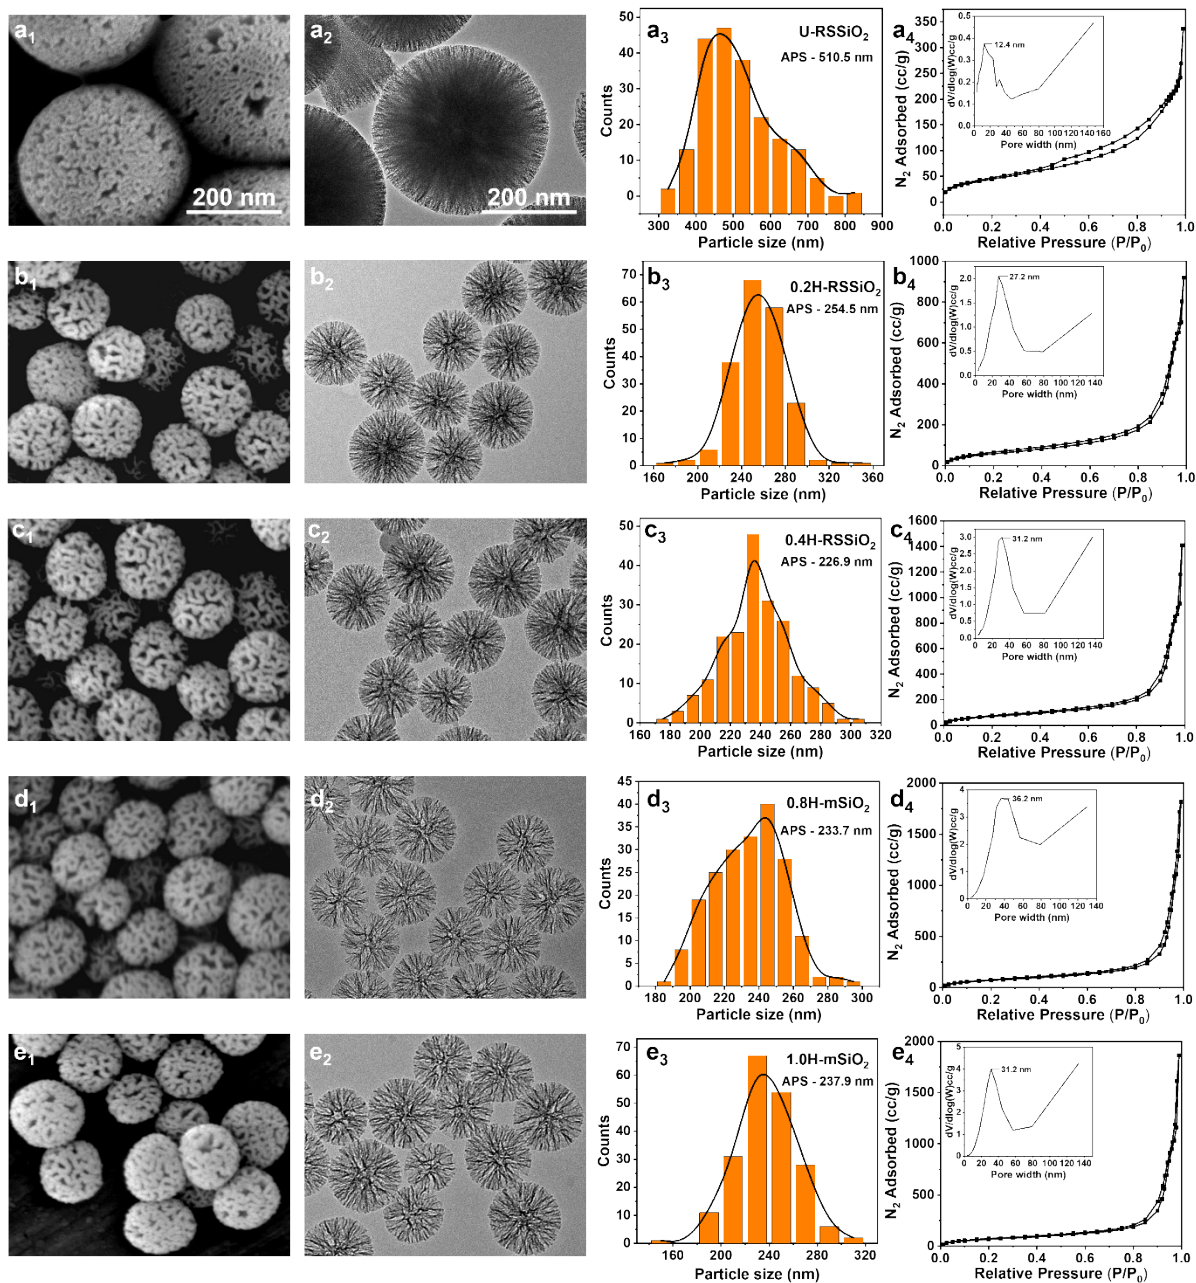

**Figure S3.** SEM images, TEM images, particle size distribution, and  $N_2$  sorption isotherm (pore size distribution in inset) with a urea concentration of (a) 0.6 g and HMT concentrations of (b) 0.2 g, (c) 0.4 g, (d) 0.8 g, (e) 1.0 g.

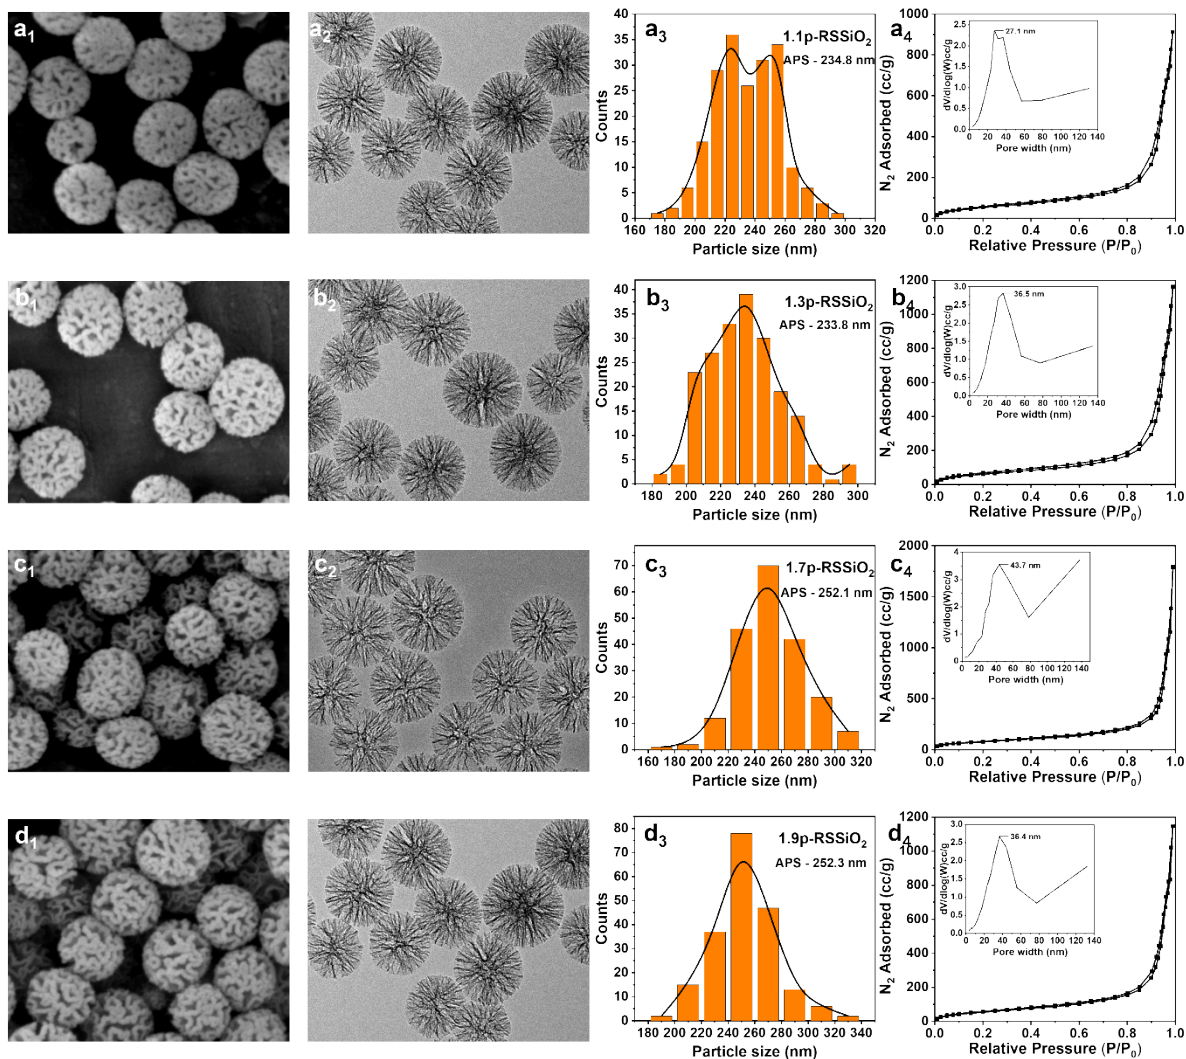

**Figure S4.** SEM images, TEM images, particle size distribution, and N<sub>2</sub> sorption isotherm (pore size distribution in inset) with a HMT concentration of 0.6 g and 1-pentanol concentrations of (a) 1.1 mL, (b) 1.3 mL, (c) 1.7 mL, (d) 1.9 mL.

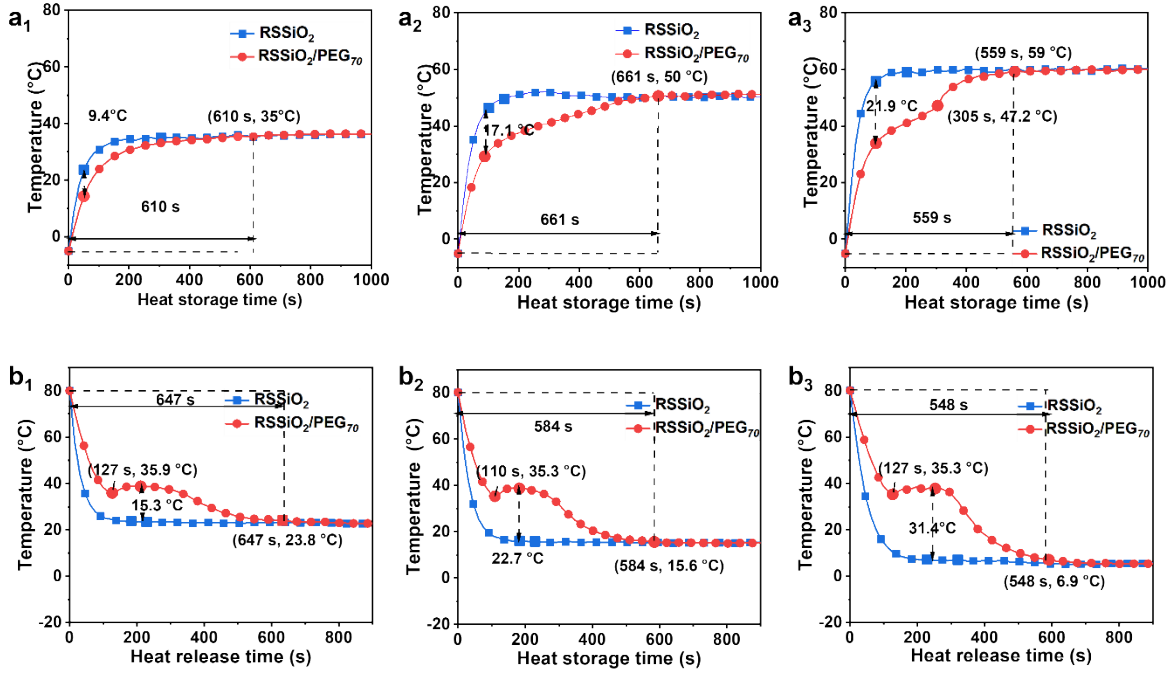

**Figure S5. Thermal management abilities of RSSiO<sub>2</sub>/PEG composites.** (a) Performance of the heat storage of RSSiO<sub>2</sub> and RSSiO<sub>2</sub>/PEG: (a1) from -5 °C to 40 °C, (a2) from -5 °C to 60 °C, (a3) from -5 °C to 70 °C. (b) Performance of the heat release on RSSiO<sub>2</sub> and RSSiO<sub>2</sub>/PEG: (b1) from 80 °C to 25 °C, (b2) from 80 °C to 15 °C, (b3) from 80 °C to 5 °C.

**Table S1 Thermal stability parameters of RSSiO<sub>2</sub>/PEG composites.**

| Samples                 | PEG(wt%) | Decomposition temperature(°C) |
|-------------------------|----------|-------------------------------|
|                         | 100%     | 301.3                         |
|                         | 40%      | 347.7                         |
|                         | 50%      | 357.7                         |
| RSSiO <sub>2</sub> /PEG | 60%      | 363.7                         |
|                         | 70%      | 357.1                         |
|                         | 80%      | 356.8                         |
| RSSiO <sub>2</sub>      | 0        | 204.4                         |



**Table S2** DSC heating and cooling characteristics of neat PEG and RSSiO<sub>2</sub>/PEG.

| Samples                               | T <sub>c</sub><br>(°C) | ΔH <sub>c</sub><br>(J/g) | T <sub>m</sub><br>(°C) | ΔH <sub>m</sub><br>(J/g) |
|---------------------------------------|------------------------|--------------------------|------------------------|--------------------------|
| PEG                                   | 37.2                   | 151.70                   | 44.3                   | 157.1                    |
| RSSiO <sub>2</sub> /PEG <sub>40</sub> | 18.9                   | 35.7                     | 35.6                   | 42.4                     |
| RSSiO <sub>2</sub> /PEG <sub>50</sub> | 19.1                   | 51.2                     | 38.2                   | 55.4                     |
| RSSiO <sub>2</sub> /PEG <sub>60</sub> | 20.6                   | 63.9                     | 38.8                   | 67.7                     |
| RSSiO <sub>2</sub> /PEG <sub>70</sub> | 31.6                   | 92.9                     | 41.0                   | 96.2                     |
| RSSiO <sub>2</sub> /PEG <sub>75</sub> | 29.6                   | 87.6                     | 40.3                   | 93.0                     |
| RSSiO <sub>2</sub> /PEG <sub>80</sub> | 30.8                   | 92.7                     | 40.5                   | 98.8                     |

**Table S3** Diffraction peak positions and crystallinity of PEG and RSSiO<sub>2</sub>/PEG<sub>x</sub>.

| Samples                               | 2θ/°                                   | Crystallinity |
|---------------------------------------|----------------------------------------|---------------|
| PEG                                   | 5.92, 19.32, 23.04, 24.42              | 44.10%        |
| RSSiO <sub>2</sub> /PEG <sub>40</sub> | 14.95, 19.084, 23.154, 26.491, 35.86   | 14.50%        |
| RSSiO <sub>2</sub> /PEG <sub>50</sub> | 14.814, 19.075, 23.181, 26.76, 35.769  | 21.00%        |
| RSSiO <sub>2</sub> /PEG <sub>60</sub> | 14.772, 19.062, 23.194, 26.741, 35.903 | 30.30%        |
| RSSiO <sub>2</sub> /PEG <sub>70</sub> | 14.822, 19.005, 23.125, 26.674, 35.764 | 39.10%        |
| RSSiO <sub>2</sub> /PEG <sub>75</sub> | 14.608, 18.968, 22.979, 26.704, 35.678 | 20.60%        |
| RSSiO <sub>2</sub> /PEG <sub>80</sub> | 14.769, 18.992, 23.131, 26.658, 35.749 | 31.90%        |

**Table S4** DSC parameters of heat-treated  $\text{RSSiO}_2/\text{PEG}_{70}$  under 100 cycles of melting/  
crystallization.

| Cycles       | $T_m$ (°C) | $\Delta H_m$ (J/g) | $T_c$ (°C) | $\Delta H_c$ (J/g) |
|--------------|------------|--------------------|------------|--------------------|
| 1st cycle    | 41.0       | 92.9               | 31.6       | 96.2               |
| 10th cycles  | 40.8       | 92.4               | 31.2       | 96.65              |
| 20th cycles  | 41.2       | 93.1               | 31.4       | 97.1               |
| 30th cycles  | 40.9       | 93                 | 30.9       | 96.23              |
| 40th cycles  | 40.5       | 92.7               | 31.3       | 97.69              |
| 50th cycles  | 41.1       | 92.5               | 31.1       | 96.4               |
| 60th cycles  | 40.9       | 93.7               | 31.0       | 96.9               |
| 70th cycles  | 40.7       | 93.5               | 30.9       | 96.3               |
| 80th cycles  | 40.8       | 93.2               | 31.1       | 96.2               |
| 90th cycles  | 41.1       | 93.4               | 31.0       | 95.9               |
| 100th cycles | 40.9       | 93.1               | 31.1       | 96.1               |
